# Supplementary figures and images for: Membrane fouling characteristics of membrane bioreactors (MBRs) under salinity shock: extracellular polymeric substances (EPSs) and the optimization of operating parameters
Source: Royal Society of Chemistry journal article supplement (doi:10.1039/d1ew00054c), 2021-01-01

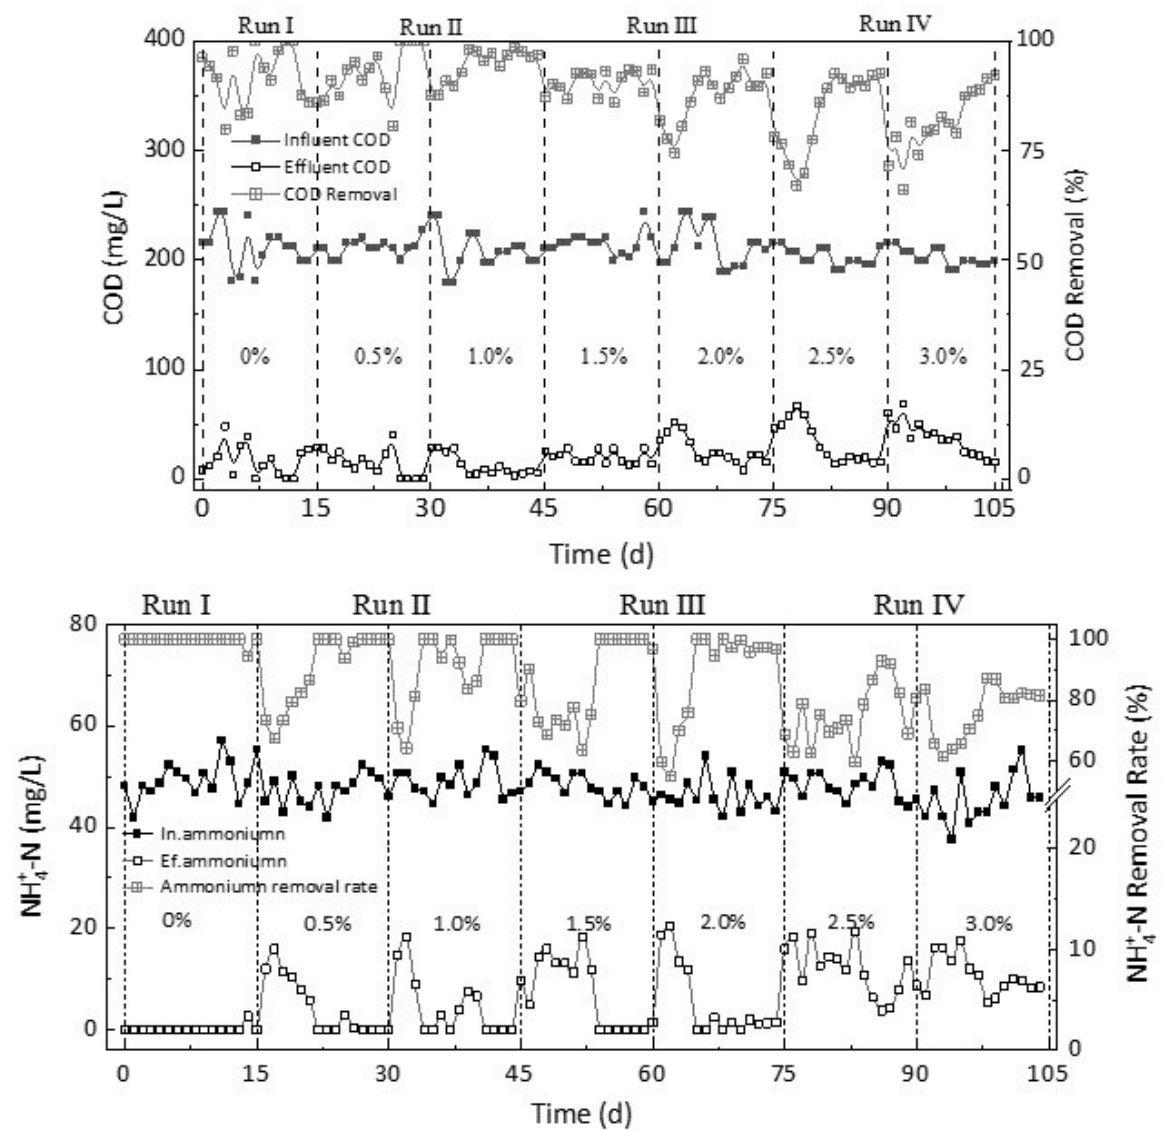

Supplement: d1ew00054c2.pdf [file d1ew00054c2.pdf]
